# Supplementary material for: The Red Harmful Plague in Times of Climate Change: Blooms of the Cyanobacterium Planktothrix rubescens Triggered by Stratification Dynamics and Irradiance
Source: Frontiers journal article supplement (doi:10.3389/fmicb.2021.705914), 2021-08-25
Supplement: Data_Sheet_1.PDF [file Data_Sheet_1.PDF]

**Supplementary Information (Figure S1, S2, S3) to:**

**The red harmful plague in times of climate change: Blooms of the cyanobacterium *Planktothrix rubescens* triggered by stratification dynamics and irradiance**

Deborah Knapp<sup>1</sup>, Bieito Fernández Castro<sup>2</sup>, Daniel Marty<sup>1</sup>, Eugen Loher<sup>1</sup>, Oliver Köster<sup>3</sup>, Alfred Wüest<sup>4,5</sup>, Thomas Posch<sup>1\*</sup>

<sup>1</sup> Limnological Station, Department of Plant and Microbial Biology, University of Zurich  
Seestrasse 187, CH-8802 Kilchberg, Switzerland

<sup>2</sup> Ocean and Earth Science, National Oceanography Centre, University of Southampton, SO14 3ZH,  
Southampton, UK

<sup>3</sup> Zurich Water Supply, Hardhof 9, CH-8021 Zurich, Switzerland

<sup>4</sup> Physics of Aquatic Systems Laboratory, Margaretha Kamprad Chair, Institute of Environmental  
Engineering, École Polytechnique Fédérale de Lausanne, CH-1015 Lausanne, Switzerland

<sup>5</sup> Eawag, Swiss Federal Institute of Aquatic Science and Technology, Surface Waters – Research and  
Management, Seestrasse 76, CH-6047 Kastanienbaum, Switzerland

\* corresponding author:

Thomas Posch

Phone: 0041 44 63 492 24

Email: [posch@limnol.uzh.ch](mailto:posch@limnol.uzh.ch)

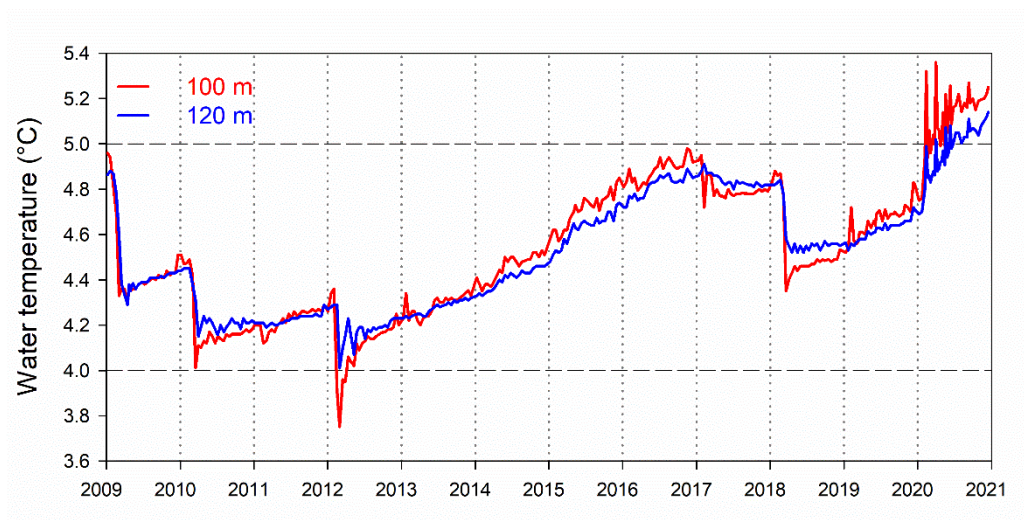

**Supplementary Figure S1:** Hypolimnetic water temperatures for two selected depths (100 m, 120 m) in Lake Zurich ( $z_{\text{max}} = 135$  m), Switzerland, during January 2009 to December 2020. Measurements were done on a biweekly basis (weekly during spring, in total 320 samplings). A YSI 6600 (YSI 6600 V2 since 2014) multiparameter probe was used for the determination of water temperature (°C). Note the cooling effect of the deep water turnover in 2012, and the continuous increase in water temperature during the period of 2014 to 2017. That period was characterized by a consecutive series of incomplete winter mixing. A sudden temperature increase to values above 5 °C was recorded in winter 2019 / 2020 after intensive storms (see [Figure 2](#)). Temperature profiles for the entire water column and depths of winter mixing are shown in [Figure 1](#).

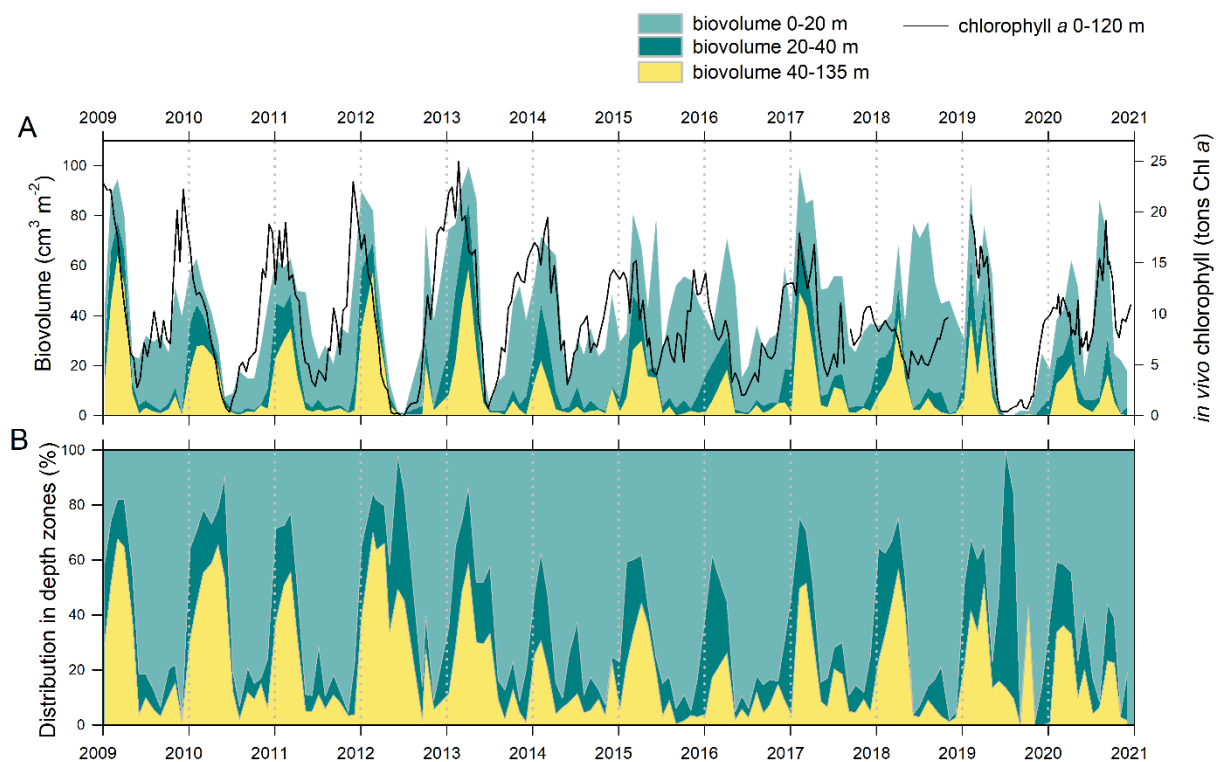

**Supplementary Figure S2:** (A) Comparison of depth-integrated total amounts of *Planktothrix rubescens* specific *in vivo* chlorophyll *a* (tons Chl *a*) with total amounts of *P. rubescens* based on biovolumes ( $\text{cm}^3 \text{m}^{-2}$ ) during the investigation period (2009 to 2020). *In vivo* Chl *a* concentrations ( $\mu\text{g Chl } a \text{ L}^{-1}$ ) were determined weekly / biweekly ( $n = 320$ ) with a bbe FluoroProbe (Moldaenke, Germany) in 1 m steps between 0 m and 120 m. Chl *a* concentrations were multiplied with the adequate lake volumes in 1 m steps, and integrated over the entire water column. Biovolumes of *P. rubescens* populations ( $\text{mm}^3 \text{L}^{-1}$ ) were determined monthly ( $n = 144$ ) and are based on microscopic counts and filament length measurements in Lugol's iodine fixed samples. Cumulative biovolumes ( $\text{cm}^3 \text{m}^{-2}$ ) of *P. rubescens* for the entire water column were computed for the depth layers 0 – 20 m, 20 – 40 m and 40 – 135 m (for details see Material and Methods). (B) Biovolume data for three depth zones as in (A) but as percentages of the total biovolume.

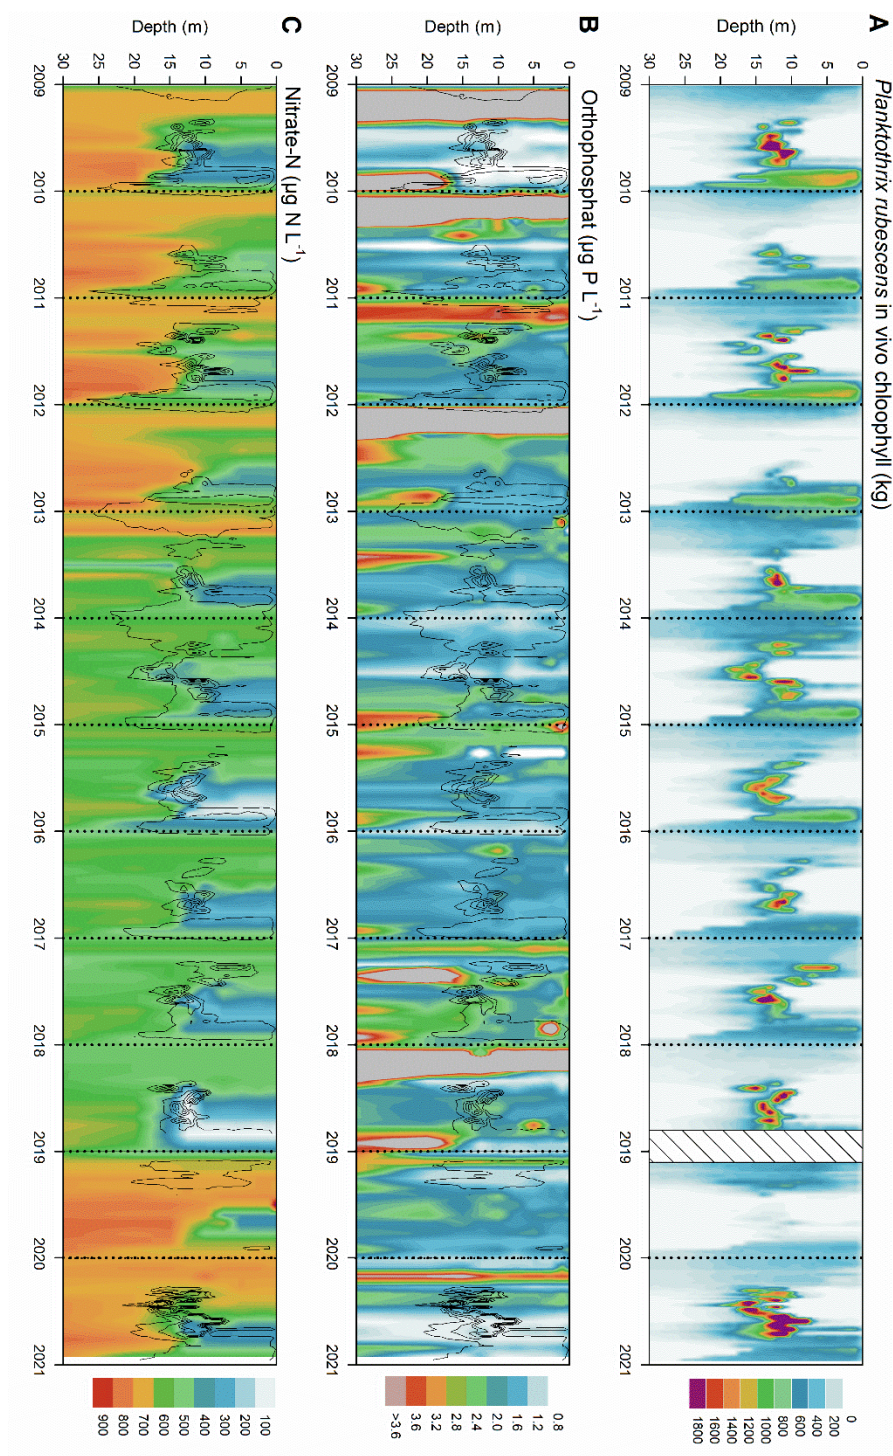

**Supplementary Figure S3:** Trends (2009-2020) in *Planktothrix rubescens* in vivo chlorophyll values, orthophosphate concentrations and nitrate concentrations in Lake Zurich (Switzerland) for the first 30 m of the water column. **(A)** In vivo chlorophyll *a* concentration ( $\mu\text{g Chl } a \text{ L}^{-1}$ ) of the cyanobacterium *P. rubescens* based on weekly / biweekly profiles ( $n = 320$ ) of parameters, measured with multi-parameter probes and interpolated in 1 m steps between 0 to 30 m depth. White striped area: no measurements from November 2018 to January 2019. **(B)** Concentrations of orthophosphate ( $\mu\text{g P L}^{-1}$ ) and **(C)** nitrate nitrogen ( $\mu\text{g N L}^{-1}$ ) with black isoline indicating the center of the *P. rubescens* population. Panels **(B-C)** are based on monthly analyses ( $n = 144$ ) of 10 sampling depths between 0 m to 30 m.
